# Supplementary material for: SSR marker-based genetic diversity and structure analyses of Camellia nitidissima var. phaeopubisperma from different populations
Source: PeerJ. 2025 Jan 21;13:e18845. doi: 10.7717/peerj.18845 (PMC11758913; doi:10.7717/peerj.18845)
Supplement: Supplemental Information 3 [file peerj-13-18845-s003.xlsx]

## Sheet: group
Table S1 Codes of 84 samples of Camellia nitidissima var. phaeopubisperma
Sample	Sampling Sites	Site Code
BB1	Shishui, Shapo, Bobai, Yulin, Guangxi, China	BB
BB2
BB3
BB4
BB5
CF1-11	Chongfeng, Jiangping, Dongxing, Fangchenggang, Guangxi, China	CF
CF1-13
CF1-14
CF1-15
CF1-19
CT1	Tiantang, Changtang, Qingxiu, Guangxi, China	CT
CT2
CT3
CT4
CT5
CZ1	Hecun, Laituan, Jiangzhou, Chongzuo, Guangxi, China	CZ
CZ2
CZ3
CZ4
CZ5
GG1	Guigang Agricultural Science and Technology Research Institute, Guangxi, China	GG
GG2
GG3
GG4
GG5
HP1	Longmenjiang, Lianzhou, Hepu, Beihai, Guangxi, China	HP
HP2
HP3
HP4
HP5
HZ1	Yimiaotang, Etang, Pinggui, Hezhou, Guangxi, China	HZ
HZ2
HZ3
HZ4
HZ5
HZC1
HZC2
HZD1
HZD2
HZD3
HZW1
HZW2
HZY
LP1	Xiaocheng, Shuangjiang, Lipu, Guilin, Guangxi, China	LP
LP2
LP3
LP4
LP5
LP6
RL1	Renli, Naliang, Dongxing, Fangchenggang, Guangxi, China	RL
RL10
RL2
RL3
RL4
RL5
RL6
RL7
RL8
RL9
SK1	Zhuguang Farm, Shikang, Hepu, Beihai, Guangxi, China	SK
SK2
SK3
SK4
SK5
SL1	Gucheng, Mingliang, Shanglin, Nanning, Guangxi, China	SL
SL2
SL3
SL4
SL5
WM1	Xialong’an, Fucheng, Wuming, Nanning, Guangxi, Chin	WM
WM2
WM3
WM4
WM5
WZ1	Wanzhang Golden Camellia Planting Base, Dianbai, Maoming, Guangdong, China	WZ
WZ2
WZ3
WZ4
WZ5
XA1	Dongzhuang, Huajiang, Xing’an, Guilin, Guangxi, China	XA
XA2
XA3
XA4
XA5
