# Supplementary material for: SSR marker-based genetic diversity and structure analyses of Camellia nitidissima var. phaeopubisperma from different populations
Source: PeerJ. 2025 Jan 21;13:e18845. doi: 10.7717/peerj.18845 (PMC11758913; doi:10.7717/peerj.18845)
Supplement: Supplemental Information 5 [file peerj-13-18845-s005.xlsx]

## Sheet: Sheet1
Table S3 Information on 32 pairs of SSR primers
Locus	Repeat Motif	FPr1(5'-3')	Annealing Temperature (℃)	RPr1(5'-3')	Annealing Temperature (℃)	Allele size (bp)
UG_304657	(TTC)8	AACTTGAGTTCACGGGGATG	59.97	TCCAAGTATCCGTAGGTGCC	59.96	121
UG_049344	(TGA)8	CCCCCAAAGTTCATTCTTCA	59.9	GAGAAAGCCCATTTGCTCTG	59.96	128
UG_002254	(GAA)8	GTATGGCGGAGAAGGATTGA	60.04	TCCATAAGGTTCGCCTTTGT	59.57	141
UG_008559	(TCC)7	CACCATCATCATCCTCAACG	59.92	AAGTAAAGGCGAGAGGCTCC	59.98	172
UG_018638	(TTC)8	AGGAAGGACAGGTGAAGGGT	59.97	GAAGCCCTAGTCCAGCACAG	60.01	172
UG_027720	(AGA)9	CCAGAGGGGTGCAATTTTTA	59.93	ATGGTAGCTTGGCTTCCTCA	59.84	137
UG_007891	(CAA)8	ACGAATGGTACCGAGACGAC	60	CTTGGGCTTGGAGAGAACAG	59.98	128
UG_010514	(GAA)7	AGAGCTCTTGGTGGAGGGTT	60.25	TGACGAGACCACTCAGTTCG	60.02	142
UG_015870	(CTT)7	GGTTTCACAATCAAGGTAAGACG	59.92	TTCGAGCGAGCTCCAATAAT	59.95	126
UG_039856	(CAC)11	CCCCACCAATTCTCTCAAAA	59.9	AAGGGCGTAGAGTTCCGATT	60.1	173
UG_043234	(TTC)13	CTAGGGGCCAAGGGACTTTA	60.44	GCCGTATGAAGTTCAACACAA	58.69	171
UG_219454	(ATC)8	CTGCCTTGTCCTCCAAGAAG	59.98	CTCTGTCGTACCTCGCCATT	60.28	136
UG_062487	(CTT)8	GGGCTTCATCTTCTTCCTCC	60.15	TTGCCAGAAGGGAAATCATC	60.01	161
UG_033333	(ATC)14	ATCCCGCTACCAACACAGTC	60	GATCGTGAAGTGAGCGATGA	59.95	172
UG_000416	(AAG)8	CTCTTCGTCGGTGAGAGACC	59.99	CGTGGACAAGGTATTTGGCT	59.99	121
UG_000442	(TCT)11	TTAAACCTCGCCACCACTTC	60.11	AAGGTCTTCGTCGGTGAGAA	59.84	149
UG_000546	(AAG)7	TGTTTGAGCGACGATTCTTG	59.99	GAGAAGGGGGAGAATTGGAG	60.01	201
UG_010720	(AAG)7	GTGGTAGCAGGAGGTTGGTC	59.58	AATGGCTTCTCTTATGCCGA	59.81	243
UG_011402	(GCT)7	CTGAGGTGGCTACTGCTTCC	60.01	TTCTCCGGAATCGGATAGTG	60.03	240
UG_015958	(CTT)7	TCAGTTCATGATCGGGACAA	60.05	CAATCTACCCATCCGAAGGA	59.89	213
UG_016750	(AGC)7	GCCAACAACAGTCCTCCAGT	60.16	CAAGAAGCTGCACCAAACAA	60.03	246
UG_025168	(CAC)7	AGAGAACCACCACCACCATC	59.82	CTTCCACAAGGAAGCAAAGC	59.99	207
UG_030878	(CAA)7	ACCGCCTCTTCTTTTTCCTC	59.83	AAGGAGCAATTGGGTCATTG	59.93	200
UG_033314	(TCT)7	CATGAGAGCTGACGATTCCA	59.94	CCGTCTTAGCAGCAACAACA	60.05	248
UG_044988	(CAA)14	AGAATGCCATCCTCCAACAG	60.07	ATTGGGTCCATACCAGGTGA	60.05	205
UG_048295	(AGC)8	CGGCTAGAAGAAGACCGATG	59.97	GGCACTGCTTTCGGAGATAG	59.98	245
UG_049190	(AAG)7	CCGATCACCAAAACCCTAGA	59.93	GAGGGCTCTGTCTCTGCATC	60.1	170
UG_059691	(GAT)7	CTTCAAATTGGTTGGGCAGT	59.97	TAATCCATTGGGAGCGAAAG	60.03	203
UG_064031	(CTC)10	CTGCGGCAGTTATTTCCAAT	60.1	CATCCCTTTATTCGGTGGTG	60.18	132
UG_071143	(TCA)12	TGGTTTTCAGGAGAGTGGCT	59.84	AAGCCAAGTACCTCCCATCA	59.55	204
UG_209907	(TTG)8	ACAGCACAACGCAACTCAAC	59.95	GCTCTTCAACCACCAAAGGA	60.23	138
UG_290536	(GAT)7	GCTATGGCTCTTGGAAGCAC	59.99	GGGCTGATGAGGAGTACCAA	60.07	242
