# Supplementary material for: SSR marker-based genetic diversity and structure analyses of Camellia nitidissima var. phaeopubisperma from different populations
Source: PeerJ. 2025 Jan 21;13:e18845. doi: 10.7717/peerj.18845 (PMC11758913; doi:10.7717/peerj.18845)
Supplement: Supplemental Information 7 [file peerj-13-18845-s007.xlsx]

## Sheet: K5-Qmatrix
Table S5 Assigned proportion of each sample in ancestor groups when K = 5
Sample	Group 1	Group 2	Group 3	Group 4	Group 5	Group from which genes are mainly inherited
BB1	0.2205	0.0166	0.7138	0.034	0.0151	group 3
BB2	0.4349	0.0288	0.4607	0.0421	0.0336	group 3
BB3	0.7744	0.0164	0.1579	0.0178	0.0336	group 1
BB4	0.9091	0.0125	0.0183	0.0242	0.036	group 1
BB5	0.0795	0.0983	0.0316	0.021	0.7696	group 5
CF1-11	0.0228	0.026	0.0111	0.8949	0.0453	group 4
CF1-13	0.0293	0.0378	0.0393	0.0254	0.8682	group 5
CF1-14	0.0239	0.5026	0.0154	0.3919	0.0663	group 2
CF1-15	0.0246	0.2627	0.057	0.3602	0.2954	group 4
CF1-19	0.0288	0.0852	0.0174	0.8178	0.0509	group 4
CT1	0.0442	0.0148	0.9225	0.009	0.0096	group 3
CT2	0.0641	0.0094	0.8914	0.0122	0.0229	group 3
CT3	0.0718	0.32	0.4231	0.0865	0.0986	group 3
CT4	0.7984	0.027	0.0524	0.0198	0.1024	group 1
CT5	0.0206	0.7618	0.0426	0.0915	0.0834	group 2
CZ1	0.6941	0.116	0.0312	0.0246	0.1341	group 1
CZ2	0.0444	0.1148	0.7359	0.0306	0.0744	group 3
CZ3	0.8111	0.0663	0.04	0.0341	0.0484	group 1
CZ4	0.8959	0.0091	0.0532	0.0117	0.0301	group 1
CZ5	0.8119	0.0573	0.0294	0.022	0.0795	group 1
GG1	0.0041	0.953	0.0053	0.0125	0.0251	group 2
GG2	0.717	0.1552	0.0249	0.0248	0.0781	group 1
GG3	0.0872	0.0095	0.8784	0.0142	0.0108	group 3
GG4	0.2091	0.0364	0.0418	0.0288	0.6839	group 5
GG5	0.0607	0.683	0.0326	0.13	0.0937	group 2
HP1	0.8609	0.0277	0.0292	0.03	0.0523	group 1
HP2	0.2471	0.0225	0.6764	0.029	0.025	group 3
HP3	0.6788	0.0439	0.1981	0.0129	0.0663	group 1
HP4	0.0574	0.0495	0.7728	0.04	0.0804	group 3
HP5	0.9252	0.0083	0.0159	0.0106	0.0401	group 1
HZC1	0.0206	0.044	0.0234	0.8202	0.092	group 4
HZC2	0.0812	0.2827	0.0268	0.1034	0.5059	group 5
HZD1	0.3783	0.0185	0.5194	0.0294	0.0543	group 3
HZD2	0.2188	0.0275	0.6706	0.036	0.0471	group 3
HZD3	0.0162	0.8038	0.0861	0.0221	0.0717	group 2
HZW1	0.0137	0.4307	0.0139	0.5017	0.0401	group 4
HZW2	0.0248	0.0232	0.0389	0.8742	0.0389	group 4
HZY	0.8177	0.0262	0.0433	0.0794	0.0334	group 1
HZ1	0.0129	0.0128	0.0083	0.9505	0.0155	group 4
HZ2	0.0306	0.192	0.0327	0.3668	0.3779	group 5
HZ3	0.0348	0.025	0.9266	0.0071	0.0064	group 3
HZ4	0.0508	0.1118	0.0353	0.2688	0.5332	group 5
HZ5	0.0512	0.1936	0.0358	0.0737	0.6458	group 5
LP1	0.0121	0.0128	0.0479	0.9176	0.0098	group 4
LP2	0.0214	0.3168	0.0434	0.5223	0.0961	group 4
LP3	0.0121	0.0516	0.0143	0.8949	0.0271	group 4
LP4	0.0131	0.0132	0.0082	0.9496	0.0158	group 4
LP5	0.0308	0.1959	0.0316	0.3654	0.3763	group 5
LP6	0.0345	0.025	0.9268	0.0072	0.0064	group 3
RL10	0.0514	0.0508	0.0432	0.0413	0.8133	group 5
RL1	0.0099	0.1829	0.0472	0.0269	0.733	group 5
RL2	0.0356	0.3924	0.0983	0.047	0.4268	group 5
RL3	0.0094	0.1277	0.0305	0.0255	0.8069	group 5
RL4	0.03	0.4048	0.0244	0.3989	0.142	group 2
RL5	0.0209	0.1637	0.0321	0.0602	0.723	group 5
RL6	0.0147	0.0923	0.037	0.7437	0.1122	group 4
RL7	0.0384	0.0907	0.019	0.8007	0.0513	group 4
RL8	0.0216	0.3662	0.0275	0.0258	0.559	group 5
RL9	0.0329	0.0368	0.0538	0.0206	0.8559	group 5
SK1	0.0087	0.7593	0.0094	0.1794	0.0432	group 2
SK2	0.1011	0.0374	0.7966	0.0241	0.0409	group 3
SK3	0.1244	0.1894	0.0549	0.2754	0.3559	group 5
SK4	0.0098	0.0966	0.0362	0.1774	0.6801	group 5
SK5	0.0261	0.0899	0.1552	0.4975	0.2313	group 4
SL1	0.0132	0.6129	0.0347	0.0234	0.3157	group 2
SL2	0.1644	0.2605	0.0474	0.2547	0.2729	group 5
SL3	0.0117	0.0151	0.0131	0.9383	0.0218	group 4
SL4	0.02	0.1178	0.072	0.4277	0.3626	group 4
SL5	0.0107	0.3642	0.0728	0.1407	0.4117	group 5
WM1	0.009	0.9477	0.0068	0.009	0.0276	group 2
WM2	0.9029	0.0117	0.0353	0.0144	0.0356	group 1
WM3	0.6054	0.0344	0.0795	0.024	0.2567	group 1
WM4	0.9063	0.0136	0.027	0.0113	0.0419	group 1
WM5	0.7488	0.0306	0.133	0.0505	0.0373	group 1
WZ1	0.1932	0.5136	0.0217	0.1209	0.1506	group 2
WZ2	0.9086	0.0124	0.0189	0.0242	0.036	group 1
WZ3	0.0102	0.7236	0.0417	0.0103	0.2142	group 2
WZ4	0.0248	0.4418	0.0262	0.0759	0.4312	group 2
WZ5	0.0125	0.0348	0.037	0.8969	0.0187	group 4
XA1	0.1366	0.1149	0.4167	0.2394	0.0924	group 3
XA2	0.8985	0.0093	0.041	0.0177	0.0335	group 1
XA3	0.0805	0.0169	0.8638	0.0114	0.0275	group 3
XA4	0.0885	0.0171	0.8594	0.0224	0.0127	group 3
XA5	0.8858	0.015	0.0431	0.0155	0.0406	group 1
