# Supplementary material for: SSR marker-based genetic diversity and structure analyses of Camellia nitidissima var. phaeopubisperma from different populations
Source: PeerJ. 2025 Jan 21;13:e18845. doi: 10.7717/peerj.18845 (PMC11758913; doi:10.7717/peerj.18845)
Supplement: Supplemental Information 8 [file peerj-13-18845-s008.xlsx]

## Sheet: group
Table S6 Clustering result of 84 samples when K=3
Sample	Cluster
BB1	2
BB2	2
BB3	2
BB4	2
BB5	1
CF1-11	1
CF1-13	1
CF1-14	1
CF1-15	1
CF1-19	1
CT1	3
CT2	2
CT3	3
CT4	2
CT5	3
CZ1	3
CZ2	1
CZ3	2
CZ4	2
CZ5	2
GG1	3
GG2	2
GG3	2
GG4	1
GG5	2
HP1	2
HP2	2
HP3	2
HP4	2
HP5	2
HZ1	1
HZ2	1
HZ3	3
HZ4	1
HZ5	1
HZC1	1
HZC2	1
HZD1	2
HZD2	2
HZD3	3
HZW1	1
HZW2	1
HZY	1
LP1	1
LP2	1
LP3	1
LP4	1
LP5	1
LP6	3
RL1	1
RL10	1
RL2	1
RL3	3
RL4	1
RL5	1
RL6	1
RL7	1
RL8	3
RL9	1
SK1	3
SK2	2
SK3	1
SK4	1
SK5	1
SL1	3
SL2	1
SL3	1
SL4	1
SL5	3
WM1	3
WM2	2
WM3	2
WM4	2
WM5	2
WZ1	3
WZ2	2
WZ3	3
WZ4	3
WZ5	1
XA1	2
XA2	2
XA3	2
XA4	2
XA5	2
