# Supplementary material for: SSR marker-based genetic diversity and structure analyses of Camellia nitidissima var. phaeopubisperma from different populations
Source: PeerJ. 2025 Jan 21;13:e18845. doi: 10.7717/peerj.18845 (PMC11758913; doi:10.7717/peerj.18845)
Supplement: Supplemental Information 9 [file peerj-13-18845-s009.xlsx]

## Sheet: Sheet1
Table S7 Genetic distances between 14 populations
	BB	CF	CT	CZ	RL	GG	HP	HZ	LP	SK	SL	WM	WZ	XA
BB	-	0.197248	0.176686	0.211998	0.228751	0.166299	0.1274	0.167025	0.227739	0.227527	0.246614	0.179186	0.197605	0.160237
CF	0.197248	-	0.249083	0.267712	0.161973	0.203984	0.267142	0.138399	0.145609	0.180106	0.16884	0.266697	0.192331	0.274415
CT	0.176686	0.249083	-	0.229902	0.231451	0.178718	0.125058	0.156083	0.23645	0.175884	0.223145	0.254164	0.258795	0.139447
CZ	0.211998	0.267712	0.229902	-	0.272109	0.292603	0.187436	0.181529	0.220454	0.321407	0.324722	0.182603	0.253811	0.190345
RL	0.228751	0.161973	0.231451	0.272109	-	0.245473	0.24797	0.167793	0.199439	0.170232	0.178542	0.299601	0.162012	0.269923
GG	0.166299	0.203984	0.178718	0.292603	0.245473	-	0.15986	0.202667	0.253944	0.193184	0.228221	0.239656	0.271534	0.211102
HP	0.1274	0.267142	0.125058	0.187436	0.24797	0.15986	-	0.152652	0.241413	0.230883	0.221182	0.206678	0.266241	0.111724
HZ	0.167025	0.138399	0.156083	0.181529	0.167793	0.202667	0.152652	-	0.0739229	0.204283	0.188125	0.188423	0.16652	0.175737
LP	0.227739	0.145609	0.23645	0.220454	0.199439	0.253944	0.241413	0.0739229	-	0.230804	0.190421	0.245842	0.195152	0.201666
SK	0.227527	0.180106	0.175884	0.321407	0.170232	0.193184	0.230883	0.204283	0.230804	-	0.1859	0.334975	0.276724	0.212115
SL	0.246614	0.16884	0.223145	0.324722	0.178542	0.228221	0.221182	0.188125	0.190421	0.1859	-	0.360111	0.263776	0.215315
WM	0.179186	0.266697	0.254164	0.182603	0.299601	0.239656	0.206678	0.188423	0.245842	0.334975	0.360111	-	0.277259	0.211772
WZ	0.197605	0.192331	0.258795	0.253811	0.162012	0.271534	0.266241	0.16652	0.195152	0.276724	0.263776	0.277259	-	0.310704
XA	0.160237	0.274415	0.139447	0.190345	0.269923	0.211102	0.111724	0.175737	0.201666	0.212115	0.215315	0.211772	0.310704	-
